# Supplementary material for: A new model for determining risk of male infertility from serum hormone levels, without semen analysis
Source: PubMed Central journal article supplement — Sci Rep. 2024 Jul 31;14:17079. doi: 10.1038/s41598-024-67910-0 (PMC11291977; doi:10.1038/s41598-024-67910-0), 2024-07-31

AI predictive analysis model based on Prediction One using evaluation criteria in the fifth edition of WHO Manual for Human Semen Testing of 2010

Prediction accuracy

Prediction accuracy level

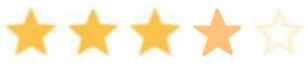

AUC 75.75%

Accuracy evaluation

| AUC     | Star Rating | Accuracy Evaluation |
|---------|-------------|---------------------|
| 88~100% | ★★★★★       | very high           |
| 74~88%  | ★★★★☆       | high                |
| 63~74%  | ★★★☆☆       | standard            |
| 56~63%  | ★★☆☆☆       | low                 |
| 0~56%   | ★☆☆☆☆       | very low            |

Accuracy details

Feature importance

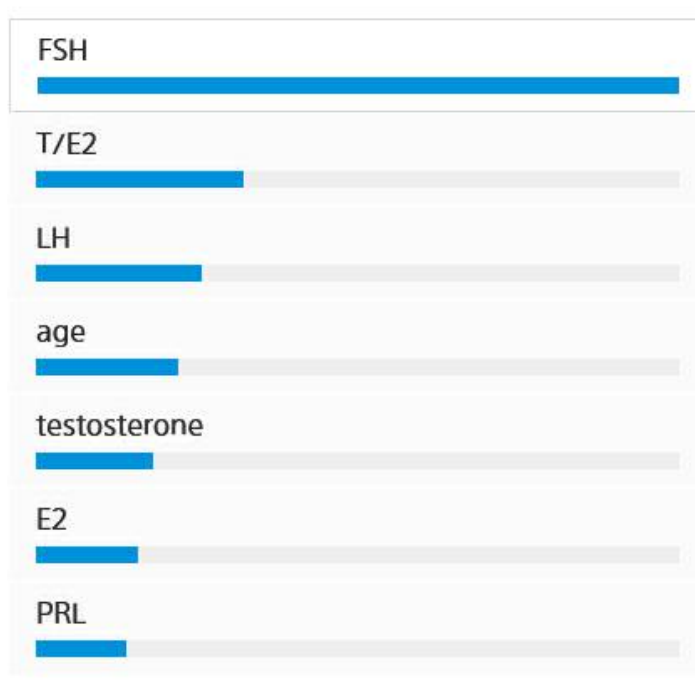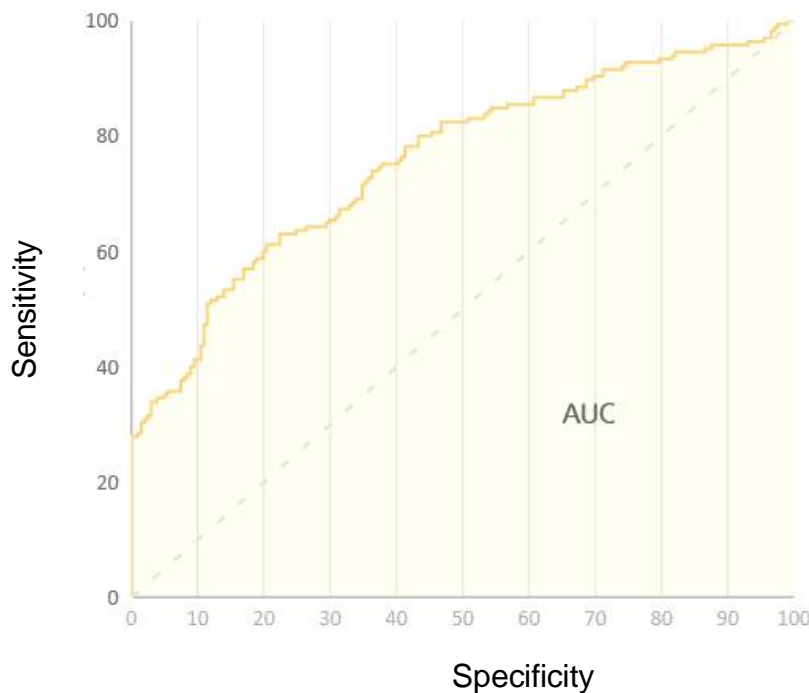

Accuracy 63.39%  
 Precision 56.28%  
 Recall 84.24%  
 F-value 67.48%

Threshold 0.30

---

Accuracy 70.77%  
 Precision 74.17%  
 Recall 53.94%  
 F-value 62.46%

Threshold 0.48

AI predictive analysis model based on AutoML Tables using evaluation criteria in the fifth edition of the WHO Manual for Human Semen Testing of 2010

AUC ROC 82.1%

AUC PR 82.3%

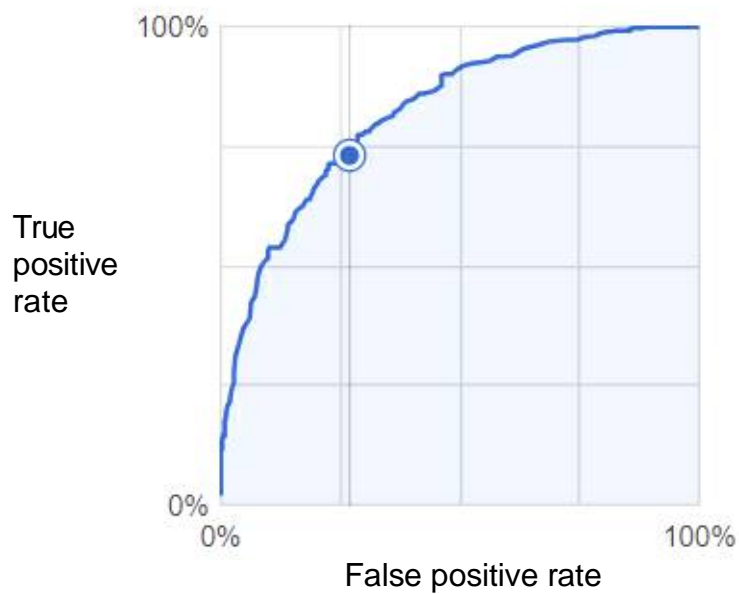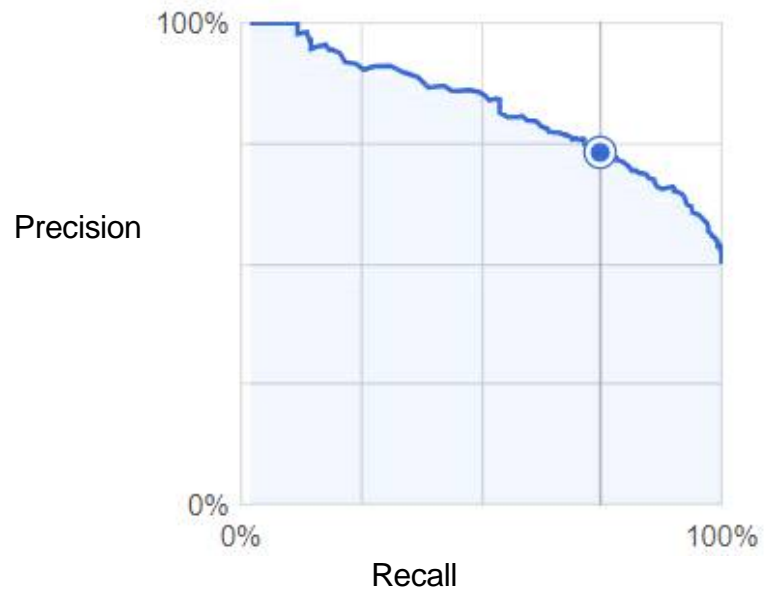

Precision 60.6%  
 Recall 94.0%  
 F-value 73.7%

Threshold 0.30

Precision 73.1%  
 Recall 73.1%  
 F-value 73.1%

Threshold 0.50

Feature importance

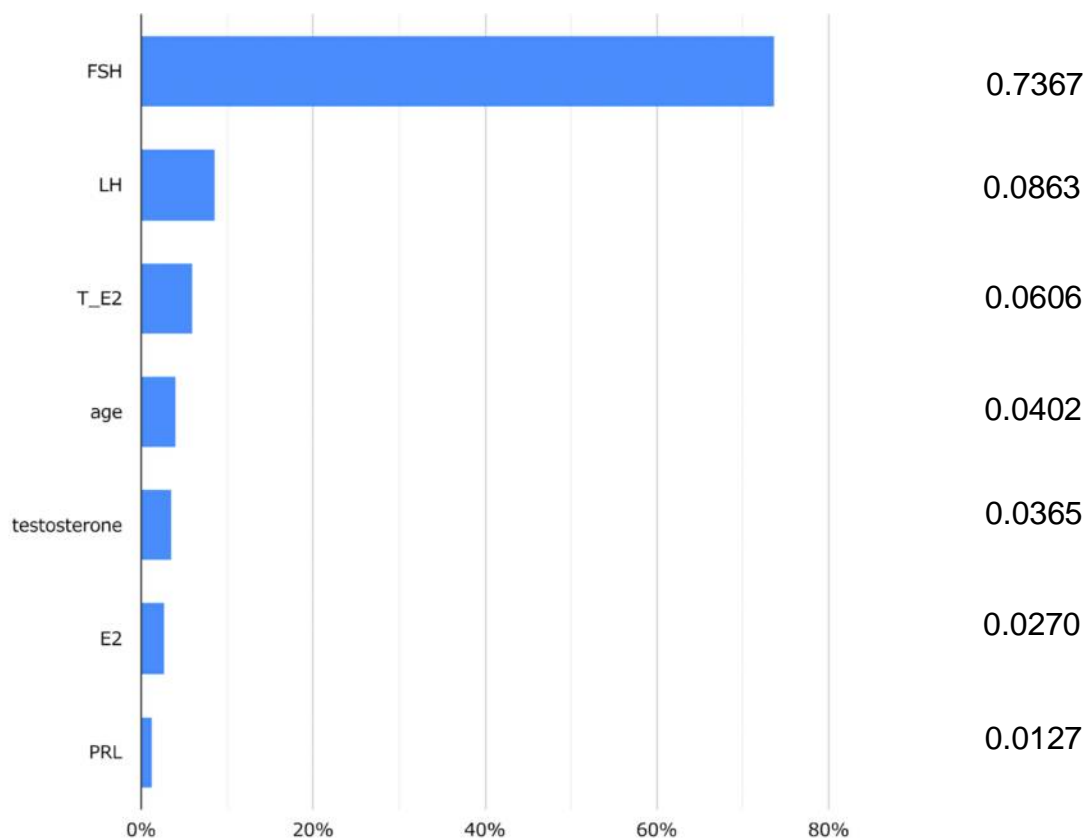

Supplement: 41598_2024_67910_MOESM1_ESM.pdf [file 41598_2024_67910_MOESM1_ESM.pdf]
